# Supplementary material for: HER2DX genomic test in HER2-positive/hormone receptor-positive breast cancer treated with neoadjuvant trastuzumab and pertuzumab: A correlative analysis from the PerELISA trial
Source: PubMed Central journal article supplement (PMC9626543; doi:10.1016/j.ebiom.2022.104320), 2022-10-29

# Supplementary Figure 1. PerELISA study design

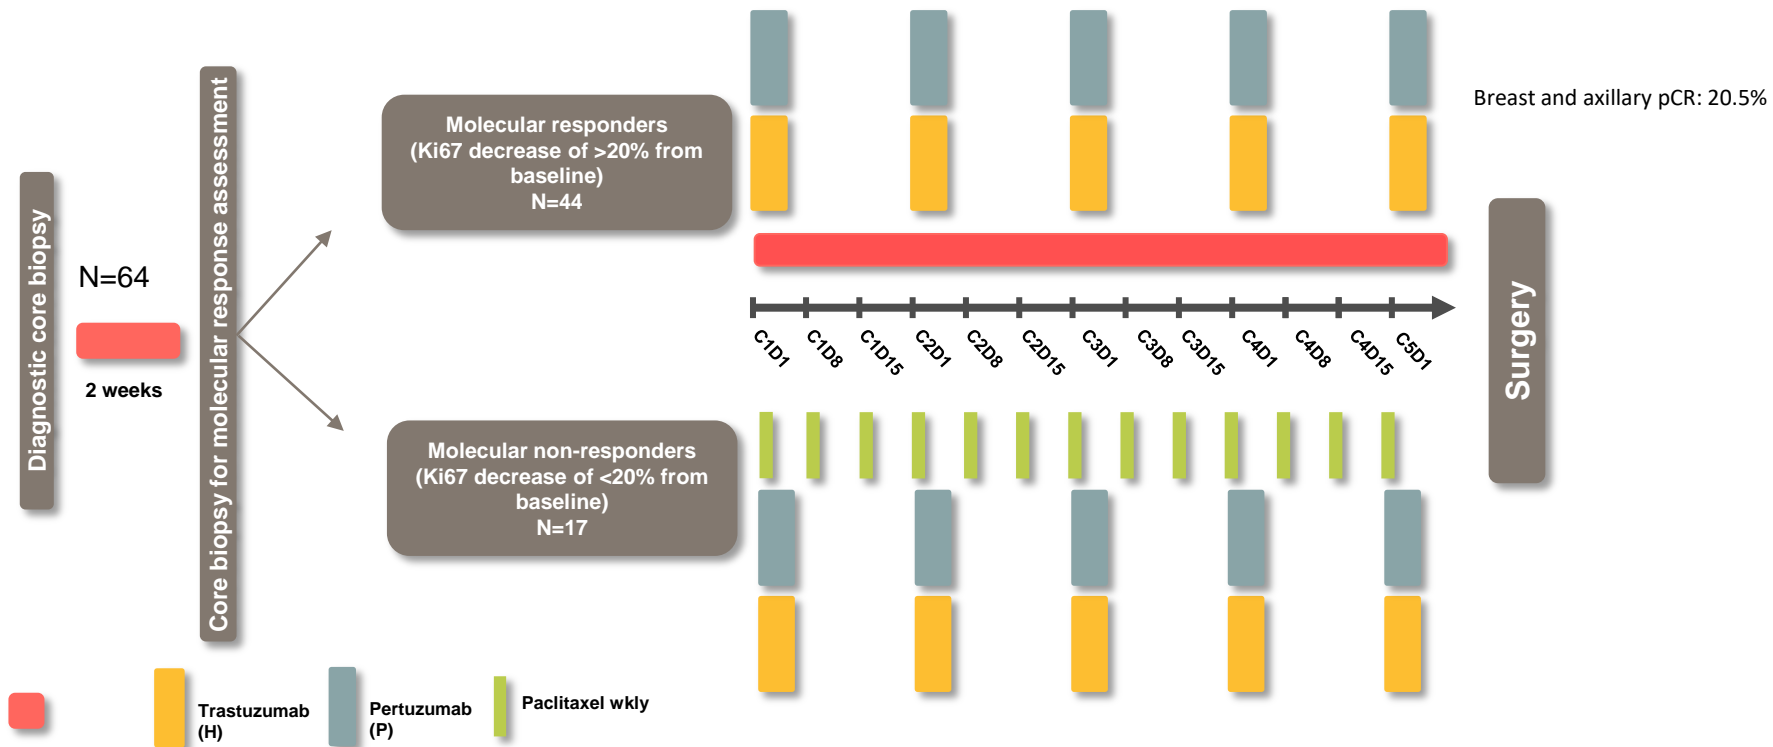

Supplement: mmc2.pdf [file mmc2.pdf]
